# Supplementary material for: Population-Based Registry Analysis of Antidiabetics Dispensations: Trend Use in Spain between 2015 and 2018 with Reference to Driving
Source: PubMed Central journal article supplement (PMC7464462; doi:10.3390/ph13080165), 2020-07-25
Supplement: pharmaceuticals-13-00165-s001.pdf [file pharmaceuticals-13-00165-s001.pdf]

**Table S1.** Oral antidiabetics and insulins available in Castile and León (2015–2018).

| Type of antidiabetic | Code ATC                               | Name                                                                   | Pictogram | DRUID category |
|----------------------|----------------------------------------|------------------------------------------------------------------------|-----------|----------------|
| Insulins             | A10AB01                                | Insulin (human), fast acting                                           | √         | I              |
|                      | A10AB04                                | Insulin lispro, fast acting                                            | √         | I              |
|                      | A10AB05                                | Insulin aspart, fast acting                                            | √         | I              |
|                      | A10AB06                                | Insulin glulisine                                                      | √         | I              |
|                      | A10AC01                                | Insulin (human), intermediate acting                                   | √         | I              |
|                      | A10AC04                                | Insulin lispro, intermediate acting                                    | √         | I              |
|                      | A10AD01                                | Insulin (human), intermediate or long acting combined with fast acting | √         | I              |
|                      | A10AD04                                | Insulin lispro, intermediate or long acting combined with fast acting  | √         | I              |
|                      | A10AD05                                | Insulin aspart, intermediate or long acting combined with fast acting  | √         | I              |
|                      | A10AE04                                | Insuline glargine                                                      | √         | I              |
|                      | A10AE05                                | Insulin detemir                                                        | √         | I              |
| A10AE06              | Insulin degludec (available from 2016) | √                                                                      | I         |                |
| Oral antidiabetics   | A10BA02                                | Metformin                                                              | X         | 0              |
|                      | A10BB01                                | Glibenclamide                                                          | √         | I              |
|                      | A10BB07                                | Glipizide                                                              | √         | I              |
|                      | A10BB09                                | Glicazide                                                              | √         | I              |
|                      | A10BB12                                | Glimepiride                                                            | √         | I              |
|                      | A10BB91                                | Glisentide                                                             | √         | I              |
|                      | A10BD05                                | Metformin and pioglitazone                                             | X         | 0              |
|                      | A10BD06                                | Glimepiride and pioglitazone                                           | √         | I              |
|                      | A10BD07                                | Metformin and sitagliptin                                              | √         | I              |
|                      | A10BD08                                | Metformin and vildagliptin                                             | √         | I              |
|                      | A10BD09                                | Pioglitazone and alogliptin                                            | √         | I              |
|                      | A10BD10                                | Metformine and saxagliptin                                             | √         | I              |
|                      | A10BD11                                | Metformin and linagliptin                                              | √         | I              |
|                      | A10BD13                                | Metformin and alogliptin                                               | √         | I              |
|                      | A10BD15                                | Metformin and dapagliflozin                                            | √         | I              |
|                      | A10BD16                                | Metformin and canagliflozin                                            | √         | I              |
|                      | A10BD19                                | Linagliptin and empagliflozin (available from 2018)                    | √         | I              |
|                      | A10BD20                                | Metformin and empagliflozin (available from 2016)                      | √         | I              |
|                      | A10BF01                                | Acarbose                                                               | X         | 0              |
|                      | A10BF02                                | Miglitol                                                               | X         | 0              |
|                      | A10BG03                                | Pioglitazone                                                           | X         | 0              |
|                      | A10BH01                                | Sitagliptin                                                            | √         | I              |
|                      | A10BH02                                | Vildagliptin                                                           | √         | I              |
|                      | A10BH03                                | Saxagliptin                                                            | √         | I              |
|                      | A10BH04                                | Alogliptin                                                             | √         | I              |
|                      | A10BH05                                | Linagliptin                                                            | √         | I              |
|                      | A10BJ01                                | Exenatide                                                              | √         | I              |
|                      | A10BJ02                                | Liraglutide                                                            | √         | I              |
|                      | A10BJ03                                | Lixisenatide                                                           | √         | I              |
|                      | A10BJ04                                | Albiglutide                                                            | √         | I              |
|                      | A10BJ05                                | Dulaglutide                                                            | √         | I              |
|                      | A10BK01                                | Dapagliflozin                                                          | √         | I              |
|                      | A10BK02                                | Canagliflozin                                                          | √         | I              |
| A10BK03              | Empagliflozin                          | √                                                                      | I         |                |
| A10BX01              | Guar gum                               | X                                                                      | 0         |                |
| A10BX02              | Repaglinide                            | √                                                                      | I         |                |
| A10BX03              | Nateglinide                            | √                                                                      | I         |                |

ATC, DRUID, DRiving Under the Influence of Drugs, alcohol, and medicines.

Table S2. Evolution of the Castile and León population and drivers's licences (2015–2018).

| Rank age     | Population       |                  |                  |                  |                  |                  |                  |                  |                  |                  |                  |                  |
|--------------|------------------|------------------|------------------|------------------|------------------|------------------|------------------|------------------|------------------|------------------|------------------|------------------|
|              | 2015             |                  |                  | 2016             |                  |                  | 2017             |                  |                  | 2018             |                  |                  |
|              | Men              | Women            | Total            | Men              | Women            | Total            | Men              | Women            | Total            | Men              | Women            | Total            |
| 0-4          | 45 405           | 42 504           | 87 909           | 44 382           | 41 386           | 85 768           | 42 905           | 40 144           | 83 049           | 41 604           | 39 121           | 80 725           |
| 5-9          | 50 925           | 48 078           | 99 003           | 50 665           | 47 821           | 98 486           | 50 035           | 47 344           | 97 379           | 48 594           | 45 657           | 94 251           |
| 10-14        | 49 439           | 47 220           | 96 659           | 49 847           | 47 730           | 97 577           | 50 316           | 48 259           | 98 575           | 51 124           | 48 407           | 99 531           |
| 15-19        | 48 620           | 46 904           | 95 524           | 48 862           | 46 935           | 95 797           | 48 939           | 46 706           | 95 645           | 49 610           | 47 885           | 97 495           |
| 20-24        | 54 724           | 53 382           | 108 106          | 53 230           | 52 333           | 105 563          | 52 182           | 51 246           | 103 428          | 51 428           | 50 777           | 102 205          |
| 25-29        | 62 787           | 61 247           | 124 034          | 61 109           | 59 382           | 120 491          | 59 522           | 57 531           | 117 053          | 58 298           | 56 506           | 114 804          |
| 30-34        | 75 089           | 71 664           | 146 753          | 71 742           | 68 841           | 140 583          | 68 575           | 66 051           | 134 626          | 65 942           | 63 241           | 129 183          |
| 35-39        | 90 372           | 87 031           | 177 403          | 87 267           | 83 676           | 170 943          | 83 600           | 80 400           | 164 000          | 79 663           | 76 944           | 156 607          |
| 40-44        | 92 686           | 89 879           | 182 565          | 92 967           | 90 094           | 183 061          | 92 799           | 89 681           | 182 480          | 92 434           | 89 499           | 181 933          |
| 45-49        | 93 082           | 91 643           | 184 725          | 93 035           | 91 392           | 184 427          | 92 076           | 90 588           | 182 664          | 91 744           | 89 952           | 181 696          |
| 50-54        | 93 252           | 90 618           | 183 870          | 93 251           | 91 395           | 184 646          | 93 500           | 91 893           | 185 393          | 92 913           | 92 426           | 185 339          |
| 55-59        | 87 280           | 84 212           | 171 492          | 88 988           | 85 894           | 174 882          | 89 831           | 86 956           | 176 787          | 90 852           | 87 988           | 178 840          |
| 60-64        | 72 448           | 69 337           | 141 785          | 75 073           | 72 029           | 147 102          | 77 520           | 74 875           | 152 395          | 79 640           | 77 583           | 157 223          |
| 65-69        | 65 430           | 66 777           | 132 207          | 66 403           | 67 268           | 133 671          | 67 615           | 68 053           | 135 668          | 67 660           | 67 825           | 135 485          |
| 70-74        | 56 526           | 61 968           | 118 494          | 58 076           | 63 396           | 121 472          | 58 913           | 64 067           | 122 980          | 60 320           | 64 908           | 125 228          |
| 75-79        | 45 154           | 56 939           | 102 093          | 43 540           | 53 807           | 97 347           | 43 510           | 52 990           | 96 500           | 46 205           | 55 251           | 101 456          |
| 80-84        | 44 543           | 62 354           | 106 897          | 44 319           | 62 772           | 107 091          | 42 312           | 60 175           | 102 487          | 39 465           | 56 065           | 95 530           |
| 85-89        | 27 547           | 46 335           | 73 882           | 28 618           | 47 555           | 76 173           | 29 407           | 48 337           | 77 744           | 29 731           | 48 690           | 78 421           |
| ≥ 90         | 13 282           | 30 034           | 43 316           | 14 119           | 31 809           | 45 928           | 14 662           | 32 970           | 47 632           | 15 333           | 34 407           | 49 740           |
| <b>Total</b> | <b>1 168 591</b> | <b>1 208 126</b> | <b>2 376 717</b> | <b>1 165 493</b> | <b>1 205 515</b> | <b>2 371 008</b> | <b>1 158 219</b> | <b>1 198 266</b> | <b>2 356 485</b> | <b>1 152 560</b> | <b>1 193 132</b> | <b>2 345 692</b> |

| Rank age | Licensed drivers |        |         |        |        |         |        |        |         |        |        |         |
|----------|------------------|--------|---------|--------|--------|---------|--------|--------|---------|--------|--------|---------|
|          | 2015             |        |         | 2016   |        |         | 2017   |        |         | 2018   |        |         |
|          | Men              | Women  | Total   | Men    | Women  | Total   | Men    | Women  | Total   | Men    | Women  | Total   |
| 15-19    | 9 282            | 5 586  | 14 868  | 9 238  | 5 634  | 14 872  | 8 357  | 4 689  | 13 046  | 8 702  | 5 102  | 13 804  |
| 20-24    | 43 294           | 35 387 | 78 681  | 42 165 | 34 280 | 76 445  | 40 859 | 33 207 | 74 066  | 39 837 | 32 570 | 72 407  |
| 25-29    | 55 831           | 50 618 | 106 449 | 53 617 | 48 755 | 102 372 | 51 913 | 46 861 | 98 774  | 50 269 | 45 329 | 95 598  |
| 30-34    | 69 810           | 61 387 | 131 197 | 66 192 | 58 489 | 124 681 | 62 677 | 56 134 | 118 811 | 59 765 | 53 560 | 113 325 |
| 35-39    | 86 841           | 75 838 | 162 679 | 83 112 | 72 880 | 155 992 | 79 204 | 70 129 | 149 333 | 74 693 | 66 771 | 141 464 |

|       |         |         |           |         |         |           |         |         |           |         |         |           |
|-------|---------|---------|-----------|---------|---------|-----------|---------|---------|-----------|---------|---------|-----------|
| 40-44 | 89 294  | 76 277  | 165 571   | 88 673  | 76 856  | 165 529   | 88 025  | 76 717  | 164 742   | 87 163  | 76 513  | 163 676   |
| 45-49 | 90 151  | 74 310  | 164 461   | 89 641  | 74 389  | 164 030   | 88 611  | 74 242  | 162 853   | 87 961  | 74 534  | 162 495   |
| 50-54 | 90 450  | 67 282  | 157 732   | 90 290  | 69 036  | 159 326   | 90 158  | 70 695  | 160 853   | 89 420  | 72 062  | 161 482   |
| 55-59 | 85 820  | 56 346  | 142 166   | 87 607  | 59 781  | 147 388   | 88 543  | 62 443  | 150 986   | 89 826  | 64 796  | 154 622   |
| 60-64 | 71 450  | 36 255  | 107 705   | 74 219  | 40 173  | 114 392   | 76 748  | 44 338  | 121 086   | 79 194  | 48 281  | 127 475   |
| 65-69 | 62 572  | 23 964  | 86 536    | 63 824  | 26 068  | 89 892    | 65 577  | 28 466  | 94 043    | 65 978  | 30 748  | 96 726    |
| 70-74 | 51 161  | 12 390  | 63 551    | 52 595  | 13 755  | 66 350    | 53 663  | 15 096  | 68 759    | 55 094  | 16 442  | 71 536    |
| 75-79 | 35 993  | 5 000   | 40 993    | 34 852  | 5 277   | 40 129    | 35 960  | 6 008   | 41 968    | 38 829  | 7 105   | 45 934    |
| 80-84 | 28 304  | 1 941   | 30 245    | 28 194  | 2 055   | 30 249    | 27 809  | 2 319   | 30 128    | 26 500  | 2 491   | 28 991    |
| 85-89 | 14 160  | 429     | 14 589    | 14 133  | 484     | 14 617    | 14 548  | 588     | 15 136    | 14 814  | 661     | 15 475    |
| ≥ 90  | 2 944   | 22      | 2 966     | 5 669   | 50      | 5 719     | 6 176   | 77      | 6 253     | 7 350   | 112     | 7 462     |
| Total | 887 357 | 583 032 | 1 470 389 | 884 021 | 587 962 | 1 471 983 | 878 828 | 592 009 | 1 470 837 | 875 395 | 597 077 | 1 472 472 |

---

**Table S3.** List of the 20 antidiabetics with the pictogram “medicines and driving” more consumed in Castile and León into the study period (packages/year).

| Code ATC | Name                                                                  | Antidiabetic Type | Packages/year |       |        |
|----------|-----------------------------------------------------------------------|-------------------|---------------|-------|--------|
|          |                                                                       |                   | Men           | Women | Total  |
| A10BD07  | Metformin and sitagliptin                                             | Oral antidiabetic | 107757        | 73555 | 181311 |
| A10BD08  | Metformin and vildagliptin                                            | Oral antidiabetic | 90540         | 64416 | 154956 |
| A10AE04  | Insuline glargine                                                     | Insulin           | 81440         | 68007 | 149446 |
| A10BB09  | Glicazide                                                             | Oral antidiabetic | 46076         | 41839 | 87915  |
| A10BX02  | Repaglinide                                                           | Oral antidiabetic | 39302         | 36674 | 75976  |
| A10BH01  | Sitagliptin                                                           | Oral antidiabetic | 28064         | 33067 | 61131  |
| A10BH05  | Linagliptin                                                           | Oral antidiabetic | 26546         | 27613 | 54159  |
| A10BB12  | Glimepiride                                                           | Oral antidiabetic | 24021         | 20851 | 44872  |
| A10AD05  | Insulin aspart, intermediate or long acting combined with fast acting | Insulin           | 16333         | 16731 | 33064  |
| A10AE05  | Insulin detemir                                                       | Insulin           | 16077         | 16479 | 32556  |
| A10AB05  | Insulin aspart, fast acting                                           | Insulin           | 17641         | 13987 | 31628  |
| A10BK01  | Dapagliflozin                                                         | Oral antidiabetic | 16602         | 12370 | 28972  |
| A10BH02  | Vildagliptin                                                          | Oral antidiabetic | 12891         | 16047 | 28938  |
| A10BD11  | Metformin and linagliptin                                             | Oral antidiabetic | 15908         | 11895 | 27803  |
| A10BJ02  | Liraglutide                                                           | Oral antidiabetic | 13435         | 12447 | 25882  |
| A10AB04  | Insulin lispro, fast acting                                           | Insulin           | 11148         | 9867  | 21015  |
| A10AD04  | Insulin lispro, intermediate or long acting combined with fast acting | Insulin           | 99983         | 10002 | 20000  |
| A10BJ05  | Dulaglutide                                                           | Oral antidiabetic | 10758         | 8652  | 19410  |
| A10BK03  | Empagliflozin                                                         | Oral antidiabetic | 11649         | 76238 | 19272  |
| A10BD15  | Metformin and dapagliflozin                                           | Oral antidiabetic | 9976          | 6917  | 16893  |

**Table S4.** Consumption of oral antidiabetic without the pictogram “medicines and driving” in Castile and León into the study period (packages/year).

| Code ATC | Name                      | Packages/year |        |        |
|----------|---------------------------|---------------|--------|--------|
|          |                           | Men           | Women  | Total  |
| A10BA02  | Metformin                 | 397527        | 318359 | 715886 |
| A10BF01  | Acarbose                  | 3983          | 4091   | 8073   |
| A10BG03  | Pioglitazone              | 2459          | 2463   | 4922   |
| A10BD05  | Metfomin and pioglitazone | 2601          | 1690   | 4291   |
| A10BX01  | Guar gum                  | 166           | 271    | 437    |
